# Supplementary material for: Geographical distribution of protozoan and metazoan parasites of farmed Nile tilapia Oreochromis niloticus (L.) (Perciformes: Cichlidae) in Yucatán, México
Source: PubMed Central journal article supplement (PMC4740987; doi:10.1186/s13071-016-1332-9), 2016-02-03
Supplement: 13071_2016_1332_MOESM2_ESM.pdf [file 13071_2016_1332_MOESM2_ESM.pdf]

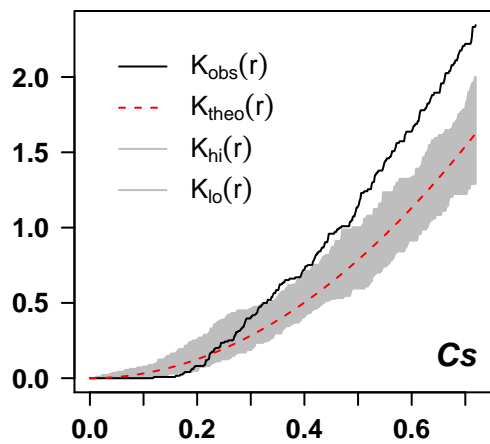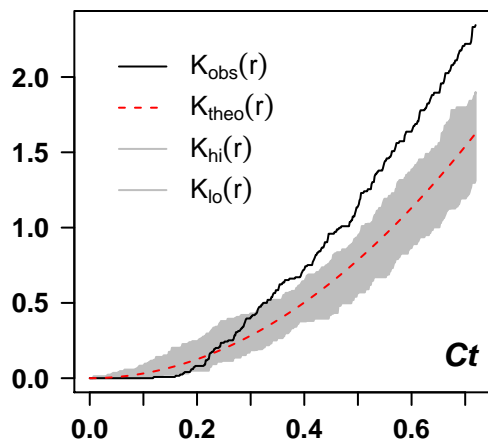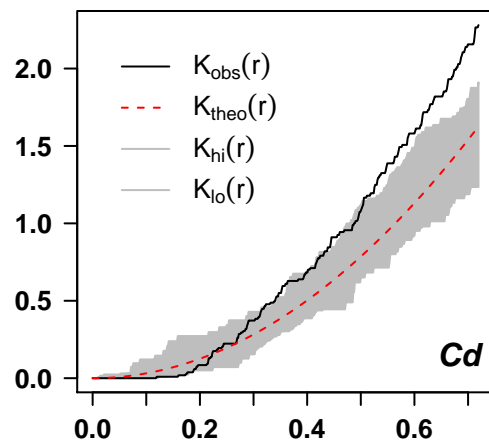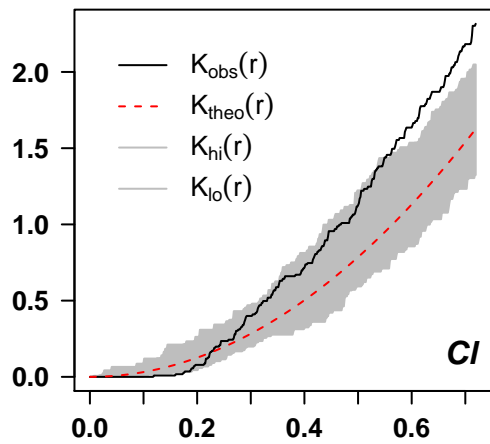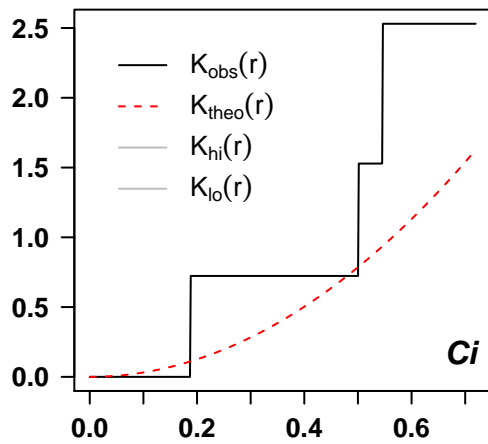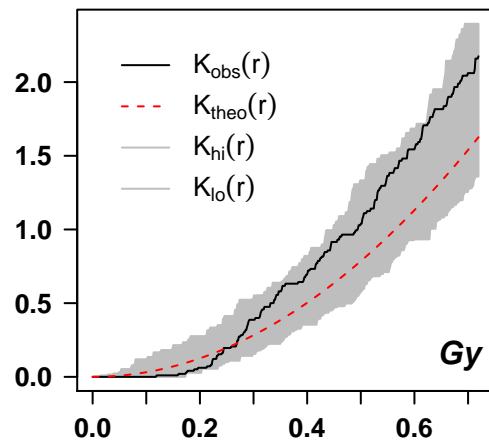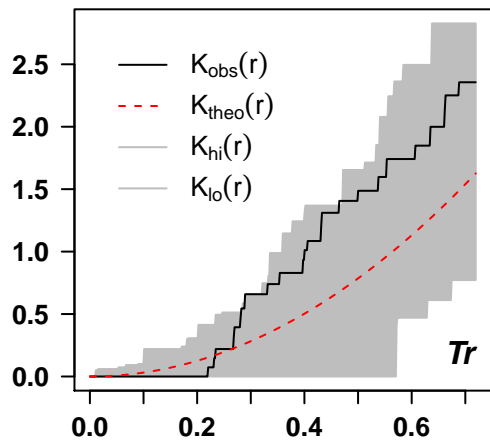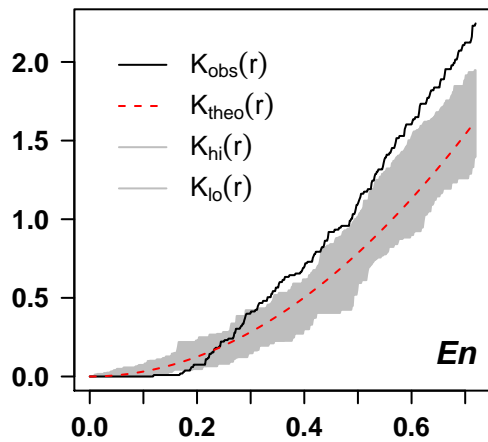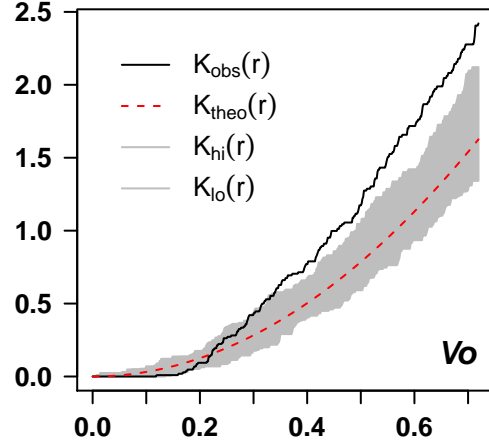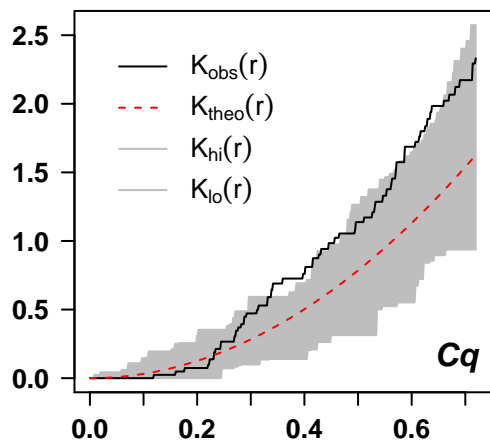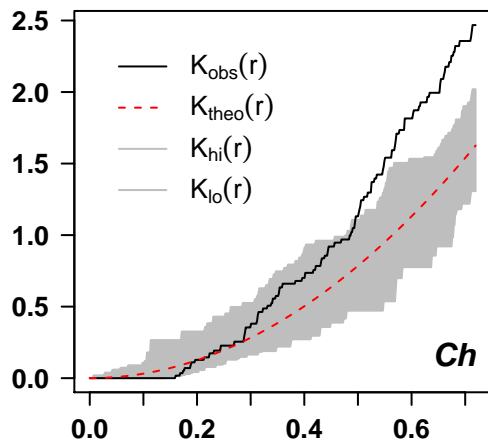

**K(r)**

**r**
